1 **Title:** Destructive disinfection of infected brood prevents systemic disease spread in  
2 ant colonies

3

4 **Short title:** Colony-level disease protection in ants

5

6 **Authors:** Christopher D. Pull<sup>1\*</sup>, Line V. Ugelvig<sup>1,†</sup>, Florian Wiesenhofer<sup>1</sup>, Simon

7 Tragust<sup>1,2,‡</sup>, Thomas Schmitt<sup>3</sup>, Mark J.F. Brown<sup>4</sup>, Sylvia Cremer<sup>1\*</sup>

8

9 **Affiliations:**

10 <sup>1</sup>IST Austria (Institute of Science and Technology Austria), 3400 Klosterneuburg,

11 Austria

12 <sup>2</sup>Evolution, Genetics and Behaviour, University of Regensburg, 93040 Regensburg,

13 Germany

14 <sup>3</sup>Department of Animal Ecology and Tropical Biology, University of Würzburg,

15 97974 Würzburg, Germany

16 <sup>4</sup>School of Biological Sciences, Royal Holloway University of London, Egham,

17 Surrey, TW20 0EX, UK

18 \*Corresponding authors: Christopher D. Pull ([cpull@ist.ac.at](mailto:cpull@ist.ac.at)), Sylvia Cremer

19 ([sylvia.cremer@ist.ac.at](mailto:sylvia.cremer@ist.ac.at))

20 † Current address: Centre for Social Evolution, Department of Biology, University of

21 Copenhagen, 2100 Copenhagen, Denmark

22 ‡ Current address: Animal Ecology I, University of Bayreuth, 95447 Bayreuth,

23 Germany

24

25 **Abstract**

26 Social insects colonies protect themselves against pathogens by collectively  
27 performing disease defences that result in social immunity. As a first barrier to  
28 disease, sanitary care between nestmates reduces individual-level exposure and  
29 infection. However, if a pathogen overcomes these defences, social insects should  
30 have evolved mechanisms to prevent individual infections causing systemic disease  
31 spread in the colony. In this study, we investigated how ants prevent disease  
32 outbreaks following the successful infection of their brood with a fungal pathogen.  
33 We found that the ants can detect lethal infections early in the non-infectious  
34 incubation period of the pathogen's lifecycle, using chemical 'sickness cues'  
35 expressed by the infected pupae. Following detection, the pupae are unpacked from  
36 their cocoons by the ants and bitten to make perforations in the cuticle, through which  
37 the ants spray their antimicrobial poison. Since the cocoon and cuticle act as barriers  
38 against the poison, this multicomponent behaviour permits the ants to use their poison  
39 for internal disinfection of the pupal body, where it can act directly against the  
40 proliferating pathogen. We termed this mechanism destructive disinfection as it killed  
41 the pupae and prevented pathogen replication. Ultimately, the ants stopped the  
42 pathogen from completing its lifecycle and transmitting to new hosts. Thus,  
43 destructive disinfection acts as a second line of defence against disease in ant colonies  
44 and is analogous to the elimination of infected cells by adaptive immune systems. Our  
45 results therefore suggest that pathogen-induced selection can result in similar  
46 solutions to common problems across the different levels of biological organisation.

47

48

49

50 **Introduction**

51 Pathogen replication and transmission from infectious to susceptible hosts is key to  
52 the success of contagious diseases [1]. Social animals are therefore expected to  
53 experience a greater risk of disease outbreaks than solitary species, because their  
54 higher number of within-group interactions will promote pathogen spread [2–4]. As a  
55 consequence, traits that mitigate this cost should have been selected for in group-  
56 living animals as an essential adaptation to social life [5,6].

57

58 Eusocial insects (termites, ants and the social bees and wasps) live in complex  
59 societies that are ecologically successful and diverse. They are typically single-family  
60 colonies comprising one or a few reproducing queens and many sterile workers. Both  
61 of these castes are highly interdependent: the queens are morphologically specialised  
62 for reproduction and cannot survive without the assistance of the workers; conversely,  
63 the workers cannot reproduce, but gain inclusive fitness by raising the queen's  
64 offspring [7]. Consequently, social insects societies have become single reproductive  
65 units, where natural selection acts on the colony instead of its individual members  
66 [8,9]. This has parallels to the evolution of complex multicellular organisms, where  
67 sterile somatic tissue and germ line cells form a single reproducing body. Hence,  
68 social insect colonies are often termed “superorganisms” and their emergence is  
69 considered a major evolutionary transition [8–11]. Since evolution favours the  
70 survival of the colony over its members, selection has resulted in a plethora of  
71 cooperative and altruistic traits that workers perform to protect the colony from harm  
72 [5,8,12,13]. In particular, social insects have evolved physiological and behavioural  
73 adaptations that limit the colony-level impact of infectious diseases, which could  
74 otherwise spread easily due to the intimate social interactions between colony

75 members [12,14–16]. These defences are performed collectively by the workers and  
76 form a layer of protection known as “social immunity” that, like the immune system  
77 of a body, protects the colony from invading pathogens [12,17].

78

79 Our understanding of how social immunity functions is based mostly on the first line  
80 of defence that reduces the probability of pathogen exposure and infection. It is well  
81 known for example that social insects avoid pathogens, like fungal spores, in their  
82 environment, and perform sanitary care when nestmates come into contact with them  
83 [18–22]. In ants, sanitary care involves grooming and the use of antimicrobial  
84 secretions to mechanically remove and chemically disinfect the pathogen, reducing  
85 the likelihood that pathogen exposure leads to the development of an infection  
86 [21,22]. However, what happens when sanitary care fails and a pathogen successfully  
87 infects an ant, with the consequent potential to create an epidemic, remains poorly  
88 understood. In a body, infected cells are eliminated by the immune system to prevent  
89 the proliferation and systemic spread of pathogens through the tissue. Since infected  
90 ants become highly contagious to their nestmates [23,24], we hypothesised that they  
91 should have evolved an analogous mechanism to detect and contain lethal infections  
92 in individuals as early as possible, to prevent disease outbreaks in the colony.

93

94 To test this hypothesis, we exposed pupae of the invasive garden ant, *Lasius*  
95 *neglectus*, to a generalist fungal pathogen, *Metarhizium brunneum*. When the  
96 infectious conidiospores of this fungus come into contact with insect cuticle, they  
97 attach, germinate and penetrate the host cuticle within 48 h to cause internal  
98 infections. After a short, non-infectious incubation period of a few days, a successful  
99 fungal infection then induces host death, after which the fungus replicates and

100 releases millions of new infectious conidiospores in a process called sporulation  
101 [23,25]. Previous work found that brood infected with *Metarhizium* is removed from  
102 the brood chamber, however, it is unknown how the ants then respond to the infection  
103 [26,27]. Here we demonstrate that ants detect infected pupae during the pathogen's  
104 non-infectious incubation period and react by performing a multicomponent  
105 behaviour. To investigate this response we used a series of behavioural and chemical  
106 experiments to determine its function and underlying mechanisms. Finally, we tested  
107 the impact of the multicomponent behaviour on the pathogen's ability to complete its  
108 lifecycle and cause a systemic colony infection.

109

## 110 **Results**

### 111 **Destructive disinfection of lethally infected pupae**

112 We exposed ant pupae to one of either three dosages of *Metarhizium* conidiospores or  
113 a sham control. We observed that ants tending pathogen-exposed pupae prematurely  
114 removed the pupae from their cocoons in a behaviour we termed “unpacking”,  
115 whereas control pupae were left cocooned (Fig 1A-B, Video S1; Cox proportional  
116 hazards regression: likelihood ratio test (LR)  $\chi^2 = 55.48$ ,  $df = 3$ ,  $P = 0.001$ ; post hoc  
117 comparisons: control vs. low,  $P = 0.004$ ; low vs. medium,  $P = 0.006$ ; medium vs. high  
118 = 0.024; all others,  $P = 0.001$ ). Unpacking occurred between 2-10 d after pathogen  
119 exposure, but sooner and more frequently at higher conidiospore dosages (Fig 1B). As  
120 unpacking was a belated response to pathogen exposure and we were unable to  
121 remove any conidiospores from the cocoon or the unpacked pupae (Fig S1), we  
122 concluded that the ants were not performing unpacking to simply dispose of the  
123 contaminated cocoons. Instead, we postulated that unpacking was a response to  
124 successful infection. At the time of unpacking, the majority of pupae were still alive

125 (Fig S2) and fungal outgrowth had not yet occurred (Fig 1F). Hence, to test if the ants  
126 were reacting to early-stage infections, we removed both unpacked and non-unpacked  
127 pathogen-exposed cocooned pupae from the ants and incubated them under optimal  
128 conditions for fungal outgrowth. We found that, on average across the conidiospore  
129 dosages, 90% of unpacked pupae harboured infections that sporulated in the absence  
130 of the ants. In contrast, only 25% of non-unpacked pupae were infected (generalised  
131 linear model [GLM]: overall LR  $\chi^2 = 21.52$ ,  $df = 3$ ,  $P = 0.001$ ; cocooned vs. unpacked  
132 pupae: LR  $\chi^2 = 18.5$ ,  $df = 1$ ,  $P = 0.001$ ; conidiospore dose: LR  $\chi^2 = 0.42$ ,  $df = 2$ ,  $P =$   
133 0.81). We therefore concluded that the ants were detecting and unpacking pupae with  
134 lethal infections during the asymptomatic incubation period of the pathogen's  
135 lifecycle. At this time point the fungus is non-infectious and so there is no risk of the  
136 ants contracting the disease.

137

138 Next, we filmed ants presented with pathogen-exposed pupae and compared their  
139 behaviour before and after unpacking. Prior to unpacking, we observed the typical  
140 sanitary care behaviours reported in previous studies [20,22,23,28]. Namely, the ants  
141 groomed the pupae (Fig 1C), which has the dual function of removing the  
142 conidiospores and applying the ants' antimicrobial poison [22]. In *L. neglectus*, the  
143 poison is mostly formic acid and is emitted from the acidopore at the abdominal tip,  
144 where the ants actively suck it up and transiently store it in their mouths until  
145 application during grooming. Additionally, the ants can spray their poison directly  
146 from the acidopore; yet, this behaviour is rarely expressed during sanitary care (about  
147 once every 28 h; Fig 1D) [22]. However, after unpacking, we observed a set of  
148 behaviours markedly different to sanitary care (Fig 1A, Video S1). The ants sprayed  
149 the pupae with poison from their acidopore approx. 15-times more frequently than

150 during sanitary care (~ 13-times/d; Fig 1D; generalised linear mixed model [GLMM]:  
151  $LR \chi^2 = 17.04$ ,  $df = 1$ ,  $P = 0.001$ ), and increased grooming by 50% (Fig 1C; linear  
152 mixed effects regression [LMER]:  $LR \chi^2 = 145.26$ ,  $df = 1$ ,  $P = 0.001$ ). Given that  
153 there was no fungus to remove at the time of unpacking, the increase in grooming  
154 probably functioned solely to apply poison from the oral store [22]. Furthermore, the  
155 ants repeatedly bit the pupae to make perforations in their cuticles (Fig 1E; GLMM:  
156  $LR \chi^2 = 39.44$ ,  $df = 1$ ,  $P = 0.001$ ). Together these three behaviours resulted in the  
157 death of the pupae and left their corpses heavily damaged and coated in the ants'  
158 poison (Fig 1G, Fig S2, Fig S3). Accordingly, we named the combination of  
159 unpacking, grooming, poison spraying and biting “destructive disinfection”, and  
160 performed a series of experiments to determine its function.

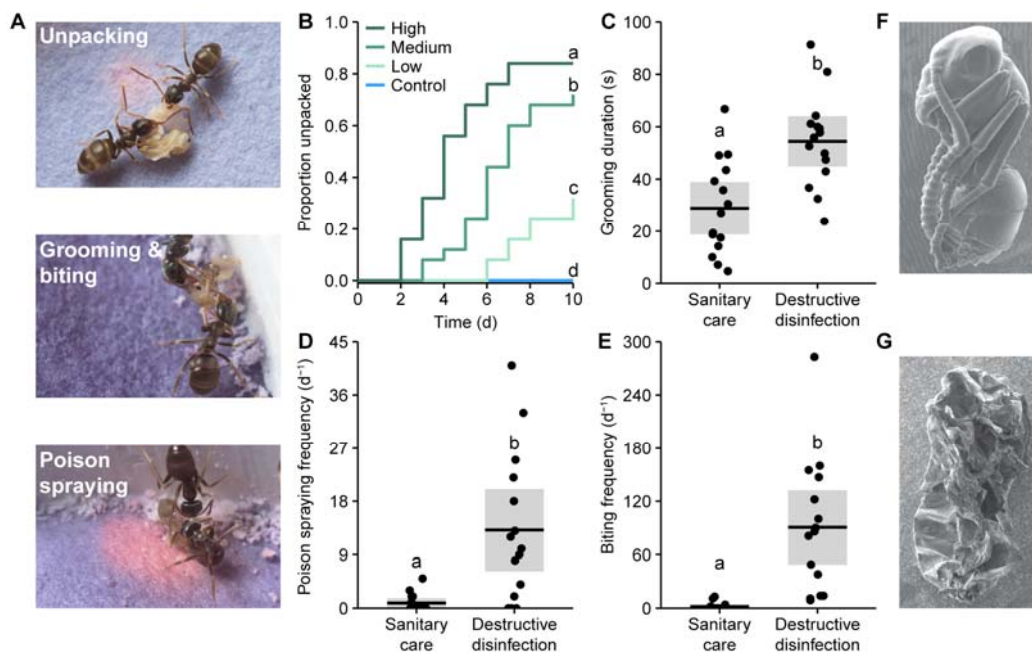

161

162 **Fig 1. Ants perform destructive disinfection in response to lethal fungal**  
163 **infections of pupae.**

164 (A) Destructive disinfection starts with the unpacking of pupae from their cocoons  
165 and is followed by grooming, poison spraying and biting (ants housed on blue pH-

166 sensitive paper to visualise acidic poison spraying, which shows up pink). (B)  
167 Unpacking occurred significantly more in pupae exposed to fungal conidiospores and  
168 was dose-dependent, occurring sooner and in higher amounts as the dose of  
169 conidiospores increased (letters denote groups that differ significantly in Tukey post  
170 hoc comparisons [ $P < 0.05$ ]). (C-E) Comparison of the ants' behaviour between  
171 sanitary care and destructive disinfection. Destructive disinfection is characterised by  
172 increases in grooming duration, poison spraying frequency and biting frequency (all  
173 data points displayed; lines  $\pm$  shaded boxes show mean  $\pm$  95% confidence intervals  
174 [CI]; letters denote groups that differ significantly in logistic regressions [ $P < 0.05$ ]).  
175 (F) Scanning electron micrographs (SEM) of an asymptomatic pupa immediately after  
176 unpacking, and (G) of a destructively disinfected pupa 24 h later.

177

### 178 **Chemical detection of internal infections**

179 Firstly, we wanted to know how the ants identify internal infections during the  
180 pathogen's non-contagious incubation period, when pupae were still alive and showed  
181 no external signs of disease. As ants use chemical compounds on their cuticles to  
182 communicate complex physiological information to nestmates [29], we speculated  
183 that infected pupae may produce olfactory sickness cues. We washed infected pupae  
184 in pentane solvent to reduce the abundance of their cuticular hydrocarbons (CHCs).  
185 When pentane-washed pupae were presented to ants, there was a 72% reduction in  
186 unpacking compared to both non- and water-washed infected pupae (Fig 2A; GLM:  
187 LR  $\chi^2 = 12.2$ ,  $df = 2$ ,  $P = 0.002$ ; Tukey post hoc comparisons: water-washed vs. non-  
188 washed,  $P = 0.79$ ; all others,  $P = 0.009$ ). As pentane-washed pupae had lower  
189 abundances of CHCs (Fig S4), this result indicates that the ants use one or more  
190 cuticle compounds to detect the infections.



191

192 Gas chromatography-mass spectrometry (GC–MS) analysis of the solvent wash  
193 confirmed that unpacked pupae have distinct chemical profiles compared to non-  
194 infected control pupae, whilst cocooned (non-unpacked) pathogen-exposed pupae  
195 were intermediate (Fig 3B, Fig S5; perMANOVA:  $F = 1.49$ ,  $df = 46$ ,  $P = 0.002$ ; post  
196 hoc perMANOVA comparisons: unpacked vs. control,  $P = 0.003$ ; unpacked vs.  
197 cocooned,  $P = 0.79$ ; cocooned vs. control,  $P = 0.08$ ). Most chemical messages in  
198 social insects are encoded by quantitative shifts of several compounds [29].

199 Correspondingly, we found that 8 out of the 24 CHCs identified (Table S1) had higher  
200 relative abundances on unpacked pupae compared to control pupae (Fig 3C-F, Fig S5;  
201 all Kruskal-Wallis [KW] test statistics and post hoc comparisons in Table S2).

202 Moreover, four of these CHCs were also present in relatively higher quantities on  
203 unpacked pupae compared to the non-unpacked cocooned pupae. Hence, several  
204 specific CHCs probably accumulate on infected pupae over time, eventually reaching  
205 an amount that, relative to the other compounds, is sufficient to elicit destructive  
206 disinfection. This corresponds to current models of social insect behaviour, where the  
207 likelihood of a response depends on stimuli exceeding a certain threshold [30,31].

208 Interestingly, the four CHCs specifically increased on unpacked pupae were all long-  
209 chained CHCs (carbon chain length  $C_{33-35}$ ) with a low volatility, meaning that the ants  
210 have to be close to or touching the pupae to detect them [32]. As ants keep pupae in  
211 large piles, using low-volatility CHCs may be important so that the ants accurately  
212 identify the sick pupae and do not mistakenly destroy healthy ones.

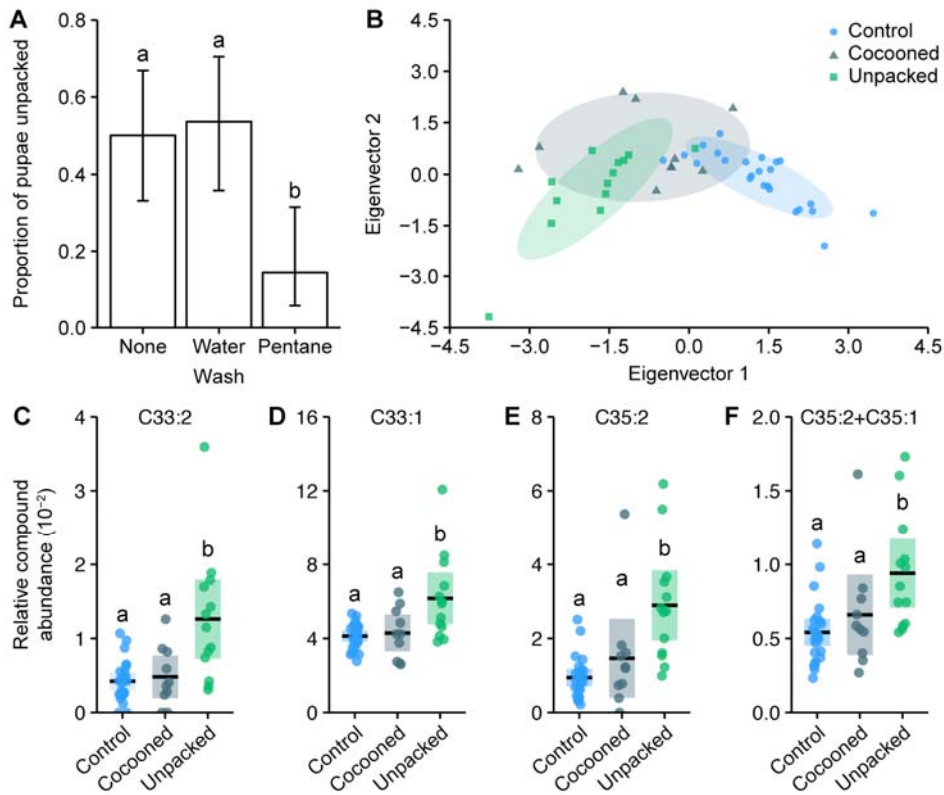

213

214 **Fig 2. Destructive disinfection is induced by changes in the chemical profile of**  
215 **infected pupae.**

216 (A) Pupae washed in pentane solvent to reduce the abundance of their cuticular  
217 hydrocarbons (CHCs) were unpacked less than unwashed or water-washed pupae  
218 (positive and handling controls, respectively; error bars show  $\pm$  95% CI; letters  
219 specify significant Tukey post hoc comparisons [ $P < 0.05$ ]). (B) Unpacked pathogen-  
220 exposed pupae have distinct chemical profiles compared to sham-treated control  
221 pupae. Pathogen-exposed pupae that were not unpacked (cocooned group) have  
222 intermediate profiles (axes show discriminant analysis of principle components  
223 eigenvectors). (C-F) The four CHCs with higher relative abundances on unpacked  
224 pupae compared to both control and cocooned pupae, (C) Tritriacontadiene, C33:2  
225 (D), Tritriacontene, C33:1 (E), Pentatriacontadiene, C35:2 (F) co-eluting  
226 Pentatriacontadiene and Pentatriacontene, C35:2+C35:1 (all data points displayed;

227 line  $\pm$  shaded box show mean  $\pm$  95% CI; letters specify groups that differ significantly  
228 in KW test post hoc comparisons [ $P < 0.05$ ]).

229

### 230 **Destructive disinfection prevents pathogen replication**

231 We next tested if destructive disinfection prevents pupal infections from replicating  
232 and becoming infectious. Pathogen-exposed pupae were kept with groups of ants (8  
233 ants per pupae per group) until unpacking. They were then left with the ants for a  
234 further 1 or 5 d before being removed and incubated for fungal growth. We compared  
235 the number that subsequently sporulated to pathogen-exposed pupae kept without  
236 ants. Whilst 90% of pupae contract infections, destructive disinfection significantly  
237 reduced the proportion of pupae that sporulated and hence became infectious (Fig 3A;  
238 GLM: LR  $\chi^2 = 40.47$ ,  $df = 2$ ,  $P = 0.001$ ; Tukey post hoc comparisons: 1 vs. 5 d,  $P =$   
239 0.04; all others,  $P = 0.001$ ). After only 1 d, the number of destructively disinfected  
240 pupae that sporulated decreased by 65%. With more time, the ants could reduce the  
241 number of pupae sporulating even further by 95%. Since the pupae were removed  
242 from the ants for fungal incubation, we can conclude that destructive disinfection  
243 permanently prevents pathogen replication. We repeated this experiment with a  
244 smaller number of ants (3 ants per pupae per group) to investigate how group size  
245 influences the success of destructive disinfection. Smaller groups of ants were less  
246 efficient than larger ones: although they could still inhibit  $> 90\%$  of pupal infections  
247 within 5 d of unpacking, pupae tested for infection after 1 d still sporulated 70% of  
248 the time (Fig S6; GLM: LR  $\chi^2 = 35.23$ ,  $P = 0.001$ ; Tukey post hoc comparisons: 0 vs.  
249 1 d,  $P = 0.2$ ; 0 vs. 5 d,  $P = 0.001$ ; 1 vs. 5 d,  $P = 0.002$ ). As the effectiveness of  
250 destructive disinfection increased with the amount of time the ants had, as well as

251 with the number of ants present, we inferred that there must be a limiting factor  
252 affecting the inhibition the pathogen.  
253  
254 To study the underlying mechanisms of destructive disinfection, we performed its  
255 different components – unpacking, biting and poison spraying – *in vitro* to test for  
256 their relative importance and potential synergistic effects. We simulated unpacking by  
257 removing the cocoons of the pupae manually, and the cuticle damage caused by biting  
258 using forceps. Previous work establishing the composition of *L. neglectus* poison [22]  
259 allowed us to create a synthetic version for use in this experiment (60% formic acid  
260 and 2% acetic acid, in water; applied at a dose equivalent to what ants apply during  
261 destructive disinfection; Fig S8), with water as a sham control. We then performed  
262 these ‘behaviours’ in different combinations in a full-factorial experiment. We found  
263 that all three behaviours must be performed in the correct order and interact to prevent  
264 pathogen replication (overview graph showing odds ratios of sporulation in Fig 3B,  
265 full data dataset displayed in Fig S7; GLM: overall LR  $\chi^2 = 79.9$ ,  $df = 5$ ,  $P = 0.001$ ;  
266 interaction between behaviours LR  $\chi^2 = 20.6$ ,  $df = 2$ ,  $P = 0.001$ ; all post hoc  
267 comparisons in Table S3). As in sanitary care, the poison was the active antimicrobial  
268 compound that inhibited fungal growth (Fig S7, Table S3 [21,22]). However, for the  
269 poison to function the pupae had to be removed from their cocoons and their cuticles  
270 damaged. Firstly, this is because the cocoon itself is hydrophobic and thus prevents  
271 the aqueous poison from reaching the pupae inside (Fig S9). Secondly, as the  
272 infection is growing internally at the time of unpacking, the cuticle must be broken in  
273 order for the poison to enter the hemocoel of the pupae. This is achieved with the  
274 perforations created by the ants biting the pupal cuticle. As the active antimicrobial  
275 component, we concluded that the poison is probably the limiting factor determining

276 whether destructive disinfection is successful. Because the poison has a slow  
277 biosynthesis and each ant can only store a limited amount [22,33], it would explain  
278 why destructive disinfection was more likely to be successful the longer the ants had  
279 to treat the pupae, and as the number of ants increased (Fig 3A, Fig S6). By sharing  
280 the task of poison synthesis and application, the ants probably increase their chances  
281 of preventing the pathogen becoming infectious.

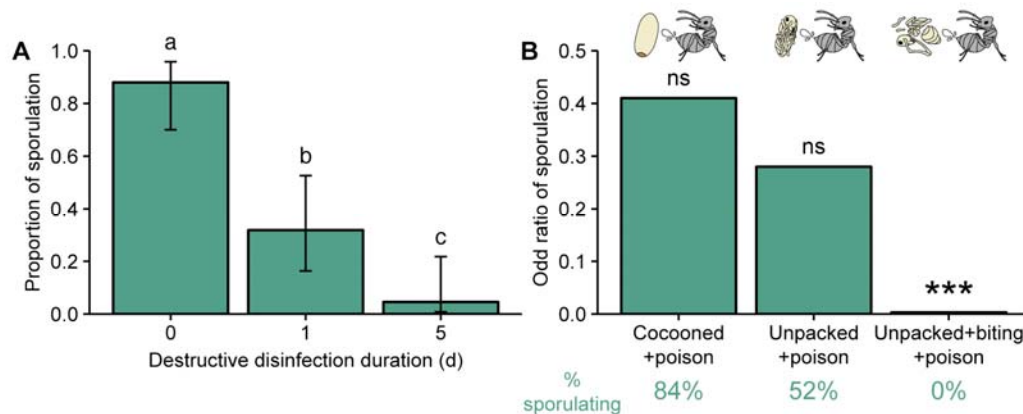

282

283 **Fig 3. Destructive disinfection by ants prevents pathogen replication.**

284 (A) Destructive disinfection greatly reduced the probability of pupae sporulating  
285 compared to pupae that received no destructive disinfection (time point 0), and its  
286 effectiveness increased with the length of time ants could perform destructive  
287 disinfection (1 vs. 5 d; error bars show  $\pm$  95% CI; letters denote groups that differ  
288 significantly in Tukey post hoc comparisons [ $P < 0.05$ ]). (B) The individual  
289 components of destructive disinfection (unpacking, biting and poison spraying)  
290 interacted to inhibit pathogen replication (% of pupae sporulating in each treatment  
291 shown under graph in green). The odds of sporulation for cocooned and unpacked  
292 pupae treated with poison were not significantly different to those of control pupae  
293 (cocooned pupae treated with water). But when unpacking, biting and poison spraying  
294 were combined the odds of sporulation were significantly reduced (logistic regression;

295 ns = non-significant deviation from control, \*\*\* =  $P < 0.001$ ; complete data set of full  
296 factorial experiment displayed in Fig S7 and all statistics in Table S3).

297

### 298 **Disruption of the pathogen lifecycle stops disease transmission**

299 Finally, we investigated the impact of destructive disinfection on disease transmission  
300 within a social host group. We created mini-nests comprising two chambers and a  
301 group of ants (5 ants per group). Into one of the chambers we placed an infectious  
302 sporulating pupa – simulating a failure of the ants to detect and destroy the infection –  
303 or a pupa that had been destructively disinfected, and was thus non-infectious. The  
304 ants groomed, moved around and sprayed both types of corpses with poison. In the  
305 case of the sporulating pupae, all conidiospores were removed from the corpse by the  
306 ants. As in previous studies, sporulating corpses were highly virulent [23,24] and  
307 caused lethal infections that became contagious after host death in 42% of ants (Fig  
308 4A). However, there was no disease transmission from destructively disinfected pupae  
309 (Fig 4A; GLM: LR  $\chi^2 = 31.32$ ,  $df = 1$ ,  $P = 0.001$ ). We therefore concluded that by  
310 preventing the pathogen from completing its lifecycle destructive disinfection stops  
311 intra-colony disease transmission (Fig 4B).

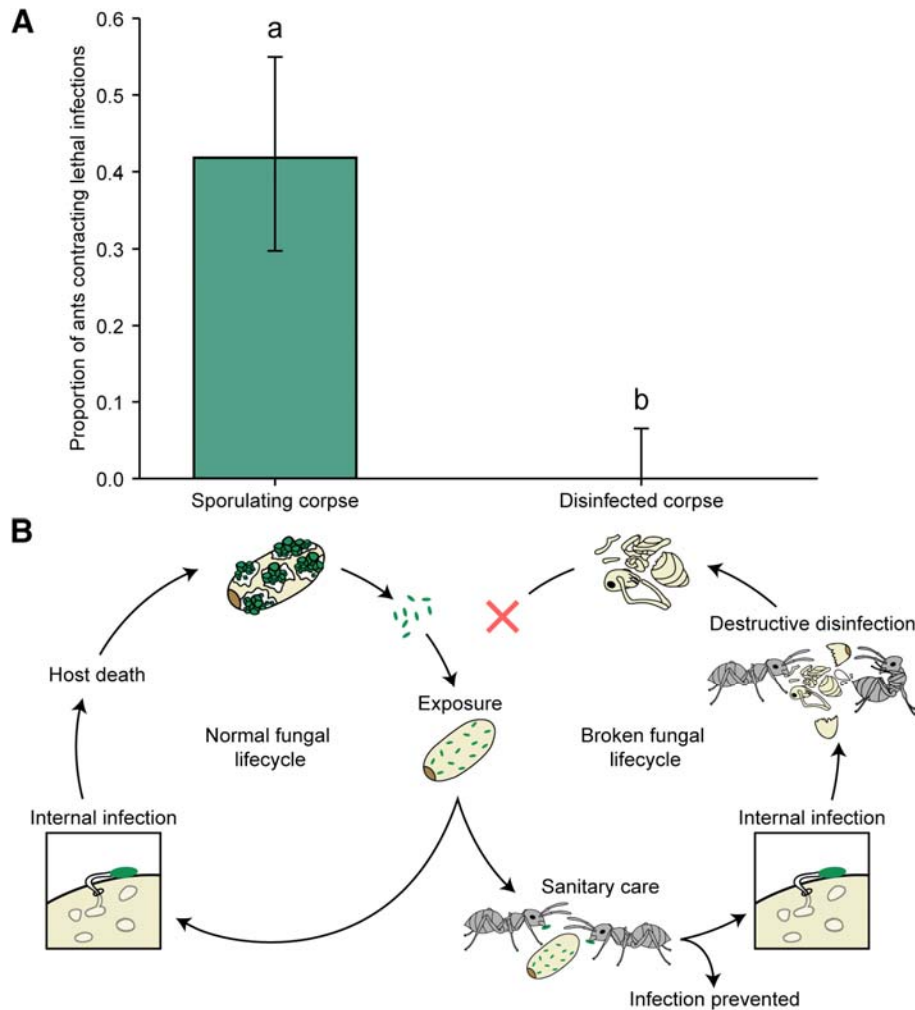

312

313 **Fig 4. Destructive disinfection stops disease transmission.**

314 (A) Ants that interacted with sporulating pupae contracted lethal infections and died

315 from fungal infection in 42% of the cases, whilst there was no disease transmission

316 from destructively disinfected pupae (error bars show  $\pm$  95% CI; letters denote groups

317 that differ significantly in a logistic regression [ $P < 0.05$ ]). (B) Overview of normal

318 fungal lifecycle resulting in infectious, sporulating corpses (left) and a broken

319 lifecycle due to the interference of the ants (right). When sanitary care fails to prevent

320 infection in pathogen-exposed individuals, the ants switch to colony-level disease

321 control, i.e. destructive disinfection to stop pathogen replication, resulting in non-

322 infectious corpses.

323

324 **Discussion**

325 Ants are extremely hygienic and frequently perform sanitary behaviours to prevent  
326 microbial infection of themselves and colony members [12]. However, if these  
327 behaviours fail, the colony faces a problem because infections can become highly  
328 contagious and cause disease outbreaks [23,24]. In this study, we have characterised a  
329 multicomponent behaviour that ants use to fight lethal infections of a common fungal  
330 pathogen. Our results show that ants detect infected pupae using chemical signatures  
331 whilst the pathogen is still in its non-transmissible incubation period (Fig 2). In  
332 contrast to the simple removal of infected brood in honeybees [15], the ants then  
333 performed destructive disinfection, utilising their antimicrobial poison for internal  
334 disinfection of the host body to stop the pathogen from replicating and completing its  
335 lifecycle (Fig 1, Fig 3). Ultimately, this prevented the fungus from infecting new hosts  
336 and effectively reduced its fitness to zero (Fig 4). These findings extend our current  
337 understanding of collective disease defence in ants, showing that they not only avoid  
338 [18], groom [20–22] and isolate pathogens [22,26], but can even interfere with the  
339 infectious cycle of the pathogen to actively arrest its establishment and replication in  
340 the colonies (Fig 4b). This will have important implications for the evolution of host-  
341 pathogen interactions in social insects, as the pathogen is unable to reproduce. More  
342 generally, our results reveal the remarkable adaptations that can evolve in  
343 superorganisms to avoid disease outbreaks.

344

345 We found that destructive disinfection acts like a second line of defence for the  
346 colony, when the first, sanitary care, fails to prevent infection. This has parallels to the  
347 immune system of the body where defences are layered to prevent pathogen



348 establishment and replication at multiple levels [17]. The first line of defence in the  
349 body is made up of mechanical and chemical defences, such as ciliated cells in the  
350 lung that move pathogens trapped in mucus out of the body [17]. In ants, grooming  
351 and chemical disinfection during sanitary care play an analogous role [20–22].  
352 However, if a pathogen circumvents these defences and a cell is infected, the second  
353 line of defence is often a targeted elimination of the cell. This starts with immune  
354 cells detecting an infection and then transporting cell death-inducing and  
355 antimicrobial compounds into the infected cell by creating pores in its membrane [34–  
356 36]. Likewise, our experiments revealed that ants detect sick pupa using chemical  
357 compounds on their cuticle. They then unpack the pupa and make perforations in its  
358 cuticle, enabling the ants to spray their poison directly into the pupa’s body. In both  
359 cases, the second line of defence destroys the infected cell/insect, along with the  
360 infection, to prevent transmission [37]. Since the loss of somatic cells and individual  
361 insect workers can be tolerated with negligible effects on fitness [17], these analogous  
362 strategies are a unique way to clear infections and avoid any further damage to the  
363 body and colony, respectively.

364

365 Previous studies have suggested that ants might use chemical cues to detect sick  
366 colony members, but evidence to support this hypothesis has been lacking [26,38,39].  
367 To our knowledge, we have therefore discovered the first known instance of ants  
368 using chemical information to identify and specifically target infected individuals.  
369 The chemical compounds with increased abundances on infected pupae are distinct  
370 from those that induce the removal of corpses in ants [40–42], and, like in tapeworm-  
371 infected ants [43], are not pathogen-derived because they are also present in lower  
372 amounts on healthy pupae. This alteration of the hosts’ chemical profile may arise

373 during infection from the breakdown of hydrocarbons by *Metarhizium* penetration  
374 [44] or after infection due to an immune response affecting the synthesis of specific  
375 hydrocarbons [45,46]. The latter is more likely as the ants only display destructive  
376 disinfection once the fungus is growing inside the pupae. Interestingly, two of the four  
377 CHCs that were increased on infected pupae also had higher abundances on virus-  
378 infected honeybees (Tritriacontadiene [47]) and their brood experiencing a simulated  
379 bacterial infection (Tritriacontene [46]). As these compounds belong to the same  
380 hydrocarbon substance class – unsaturated hydrocarbons – their common biosynthetic  
381 pathway might be upregulated upon infection. This raises the possibility that these  
382 hydrocarbons are evolutionarily conserved sickness cues in Hymenopteran social  
383 insects. Such cues may have evolved into general sickness signals in social insects as  
384 they alert nestmates to the presence of an infection that will harm the colony if it  
385 spreads [48]. Similar to the “find-me/eat-me” signals expressed by infected cells in a  
386 body [49,50], they will be selected for as they enhance colony fitness by preventing a  
387 systemic infection. Hence, altruistic displays of sickness can evolve in  
388 superorganisms, even if this results in the destruction of the individual that expresses  
389 them.

390

391 It is well established that social insects use glandular secretions with antimicrobial  
392 properties as external surface disinfectants [51]. However, because these compounds  
393 can also harm the host, they should be used with caution inside the colony. For  
394 example, the acidic poison *L. neglectus* and other Formicine ants produce is extremely  
395 caustic and is used to attack conspecifics [22,33,52]. During sanitary care they apply  
396 this poison via grooming because it is probably more accurate and less wasteful than  
397 spraying [22]. Moreover, as pathogen-exposed insects typically survive when they

398 receive sanitary care [20–23], conservatively applying the poison may also reduce the  
399 damage it causes to individuals that can then continue contributing to the colony. This  
400 is supported by our observation that *L. neglectus* will apply large quantities of poison  
401 onto pupae only when they become infected. Remarkably, we found that, in addition  
402 to being external disinfectants, ants use antimicrobial secretions as internal  
403 disinfectants against infections within the bodies of nestmates. Since infected pupae  
404 are moribund there is no risk that the ants' poison is harming individuals with a future  
405 role in the colony. Taken together, these observations suggest that ants adjust their  
406 behaviours in response to the risk presented to the colony. It would be interesting to  
407 explore further how social immunity defences are regulated to prevent collateral  
408 damage, or 'social immunopathology', within the colony.

409

410 Our experiments show that destructive disinfection was highly effective and  
411 prevented 95% of infections becoming transmissible. Destructive disinfection will  
412 thus keep the average number of secondary infections caused by an initial infection  
413 small and the disease will die out within the colony [3]. This may explain why  
414 infections of *Metarhizium* and other generalist entomopathogenic fungi like  
415 *Beauveria*, though common in the field [53–56], do not seem to cause colony-wide  
416 epidemics in ants, but are more numerous in solitary species that lack social immunity  
417 [57–59]. Behaviours like destructive disinfection that are able to reduce pathogen  
418 fitness to zero could have selected for host manipulation in fungi that specialise on  
419 infecting ants, e.g. *Ophiocordyceps* and *Pandora* [60–62]. These fungi force their ant  
420 hosts to leave the nest and climb plant stems near foraging trails. There they die and  
421 become infectious, releasing new spores that infect ants foraging below. However,  
422 ants infected with *Ophiocordyceps* that were experimentally placed back into the nest

423 disappeared [61]. Our study suggests that these ants could have been eliminated  
424 through destructive disinfection. Consequently, ant-specialist fungi like  
425 *Ophiocordyceps* and *Pandora* may have evolved host manipulation as a means to  
426 complete their lifecycle outside of the nest and avoid destructive disinfection [61,62].  
427 In contrast to specialists, generalist pathogens like *Metarhizium* infect a broad range  
428 of solitary and social hosts, making it less likely that they evolve strategies to escape  
429 social immunity defences [63]. Future work that investigates how social immunity  
430 disrupts typical host-pathogen dynamics will shed light on the co-evolution of  
431 pathogens and their social hosts [3].

432

433 Destructive disinfection has probably evolved in ants because the removal of corpses  
434 from the colony alone does not guarantee that disease transmission is prevented [61].  
435 This is because ants place corpses onto midden (trash) sites that are located inside or  
436 outside near the nest and regularly visited by midden workers [64–66]. Consequently,  
437 midden sites represent a potential source for disease transmission back into the  
438 colony. In contrast to ants, honeybees have no middens and corpses are dumped  
439 randomly outside of the hive [15]. But because honeybees forage on the wing, it is  
440 unlikely that corpses are re-encountered and so removal is sufficient to prevent  
441 disease transmission [67]. Termites on the other hand perform a different behaviour,  
442 whereby the dead are cannibalised [19,68]. Cannibalism is effective because the  
443 termite gut neutralises ingested pathogens [69–71] and has likely evolved because  
444 dead nestmates are a source of valuable nitrogen in their cellulose-base diet [72]. The  
445 same selective pressure has driven this suite of independently evolved innovations –  
446 the need to eliminate or remove infected individuals early in the infectious cycle –  
447 with the ants expressing a particularly complex behavioural repertoire. This seems to

448 be a general principle in disease defence as cells are also rapidly detected and  
449 destroyed shortly after infection to prevent pathogen spread in multicellular organisms  
450 [17]. Understanding how natural selection can result in similar traits at different levels  
451 of biological organisation and in organisms with different life histories is a central  
452 question in evolutionary biology [8]. Studying the similarities and differences  
453 between organismal immunity and social immunity could therefore lead to new  
454 insights about how disease defences evolve [17]. For example, the results of our study  
455 suggest that equivalent selection pressures can result in convergent defences that  
456 protect multicellular organisms and superorganismal insect societies from systemic  
457 disease spread. Future work that can link the performance of social immunity  
458 defences to colony fitness will therefore provide useful insights into how such traits  
459 are selected for over evolutionary time.

460

## 461 **Materials and Methods**

### 462 **Ant host**

463 We studied the unicolonial invasive garden ant, *Lasius neglectus*, collected in Seva,  
464 Spain (41.809000, 2.262194) [55]. Stock colonies were kept at a constant temperature  
465 of 23°C with 70% humidity and a day/night cycle of 14/10 h. All experiments were  
466 conducted in plastered petri dishes ( $\varnothing = 33, 55$  or 90 mm) with 10% sucrose solution  
467 provided *ad libitum* and environmental conditions were controlled throughout (23°C;  
468 70% RH; 14/10 h light/dark cycles). Care of animals was in accordance with  
469 institutional guidelines.

470

### 471 **Fungal pathogen**

472 As a model pathogen, we used the entomopathogenic fungus *Metarhizium brunneum*  
473 (strain MA275, KVL 03-143). Multiple aliquots were kept in long-term storage at –  
474 80°C. Prior to each experiment the conidiospores were grown on sabaroud dextrose  
475 agar at 23°C until sporulation and harvested by suspending them in 0.05% sterile  
476 Triton X-100 (Sigma). The germination rate of conidiospore suspensions was  
477 determined before the start of each experiment and was > 90% in all cases.

478

### 479 **Pupal pathogen exposure**

480 Conidiospores were applied in a suspension of 0.05% autoclaved Triton-X 100 at 10<sup>6</sup>  
481 conidia/ml in all experiments unless otherwise stated. Throughout the study, we used  
482 cocooned worker pupae of approximately the same age, which was determined by  
483 assessing the melanisation of the eyes and cuticle. Single pupae were exposed by  
484 gently rolling them in 1 µl of the conidiospore suspension using sterile soft forceps.  
485 Pupae were then allowed to air dry for 5-10 min before being used in experiments.  
486 This exposure procedure resulted in pupae receiving ~ 1800 conidiospores, of which  
487 5% (~ 95 conidiospore) passed through the cocoon and came into contact with the  
488 pupa inside (Fig S1).

489

### 490 **Statistical Analysis**

491 Statistical analyses were carried out in R version 3.3.2 [73]. All statistical tests were  
492 two-tailed. General(ised) linear and mixed models were compared to null (intercept  
493 only) and reduced models (for those with multiple predictors) using Likelihood Ratio  
494 (LR) tests to assess the significance of predictors [74]. We controlled for the number  
495 of statistical tests performed per experiment to protect against a false discovery rate  
496 using the Benjamini-Hochberg procedure ( $\alpha = 0.05$ ). Moreover, all post hoc analyses

497 were corrected for multiple testing using the Benjamini-Hochberg procedure ( $\alpha =$   
498 0.05) [75,76]. We checked the necessary assumptions of all tests i.e. by viewing  
499 histograms of data, plotting the distribution of model residuals, checking for non-  
500 proportional hazards, testing for unequal variances, testing for the presence of  
501 multicollinearity, testing for over-dispersion, and assessing models for instability and  
502 influential observations. For mixed effects modelling, we used the packages ‘lme4’ to  
503 fit models [77], ‘influence.ME’ to test assumptions [78], and, for LMERS, ‘lmerTest’  
504 to obtain  $P$  values [79]. All logistic regressions were performed using either  
505 generalised linear models (GLMs) or generalised linear mixed models (GLMMs),  
506 which had binomial error terms and logit-link function. The Cox proportional hazards  
507 regression was carried out using the ‘coxphf’ package with post hoc comparisons  
508 achieved by re-levelling the model and correcting the resulting  $P$  values [80]. For  
509 Kruskal-Wallis (KW) tests and subsequent post hoc comparisons we used the  
510 ‘agricolae’ package, which implements the Conover-Iman test for multiple  
511 comparisons using rank sums [81]. For the perMANOVA, we used the package  
512 ‘vegan’ and performed pairwise perMANOVAs for post hoc comparisons [82]. All  
513 other post hoc comparisons were performed using the ‘multcomp’ package [83].  
514 Finally, all graphs were made using the ‘ggplot2’ package [84]. Individual  
515 descriptions of statistical analyses are given for all experiments below.

516

### 517 **Unpacking behaviour**

518 To study how ants respond to infections, we exposed pupae to a low ( $10^4$ /ml),  
519 medium ( $10^6$ /ml) or high ( $10^9$ /ml) dose of conidiospores or autoclaved Triton X as a  
520 sham control (sham control,  $n = 24$ ; all other treatments,  $n = 25$ ). The pupae were  
521 then placed into individual petri dishes with two ants and inspected hourly for 10 h/d

522 for 10 d. When the ants unpacked a pupa, it was removed and surface-sterilised [85]  
523 to ensure that any fungal outgrowth was the result of internal infections and not  
524 residual conidiospores on the cuticle. After sterilisation, we transferred the pupae to a  
525 petri dish lined with damp filter paper at 23°C and monitored them for 2 weeks for  
526 *Metarhizium* sporulation to confirm the presence of an internal infection (low dose,  $n$   
527 = 8; medium dose,  $n = 18$ ; high,  $n = 21$ ). In addition, any cocooned pupae that were  
528 not unpacked after 10 d were removed from the ants, surface sterilised and observed  
529 for sporulation, as above (low dose,  $n = 11$ ; medium dose,  $n = 4$ ; high,  $n = 4$ ). We  
530 analysed the effect of treatment on unpacking using a Cox proportional hazards model  
531 with Firth's penalized likelihood, which offers a solution to the monotone likelihood  
532 caused by the complete absence of unpacking in the sham control treatment. We  
533 followed up this analysis with post hoc comparisons (model factor re-levelling) to test  
534 unpacking rates between treatments (Fig 1B). We compared the number of unpacked  
535 and cocooned pupae sporulating using a logistic regression, which included pupa type  
536 (cocooned, unpacked), conidiospore dose (low, medium, high) and their interaction as  
537 main effects. The interaction was non-significant (GLM: LR  $\chi^2 = 5.0$ ,  $df = 2$ ,  $P =$   
538 0.084); hence, it was removed to gain better estimates of the remaining predictors.

539

#### 540 **Images and scanning electron micrographs (SEMs) of destructive disinfection**

541 Photographs of destructive disinfection were captured (Nikon D3200) and  
542 aesthetically edited (Adobe Photoshop) to demonstrate the different behaviours (Fig  
543 1A). They were not used in any form of data acquisition. We also made representative  
544 SEMs of a pupa directly after unpacking and one after destructive disinfection (24 h  
545 after unpacking; Fig 1F-G). As the pupae were frozen at  $-80^{\circ}\text{C}$  until the SEMs were



546 made, we also examined non-frozen pupae taken directly from the stock colony and  
547 confirmed that freezing itself does not cause damage to the pupa (not shown).

548

### 549 **Comparison of sanitary care and destructive disinfection behaviours**

550 To observe how the behavioural repertoire of the ants changes between sanitary care  
551 and destructive disinfection, we filmed three individually colour-marked ants tending  
552 a single pathogen-exposed pupa with a USB microscope camera (Di-Li ® 970-O). To  
553 characterise the sanitary care behaviours of the ants, we analysed the first 24 h of the  
554 videos following the introduction of the pupa. To study destructive disinfection  
555 behaviours, we analysed the 24 h period that immediately followed unpacking.  
556 Videos were analysed using the behavioural-logging software JWatcher™ [86]. For  
557 each ant ( $n = 15$ ), we recorded the duration of its grooming bouts, the frequency of  
558 poison application and the frequency of biting. Grooming duration was analysed using  
559 a LMER, having first log-transformed the data to fulfil the assumption of normality  
560 (Fig 1C). The frequency of poison application and biting (Fig 1D-E) were analysed  
561 using separate GLMMs with Poisson error terms for count data and logit-link  
562 function. We included an observation-level random intercept effect to account for  
563 over-dispersion in the data [87]. In all three models, we included petri dish identity as  
564 a random intercept effect because ants from the same dish are non-independent.  
565 Additionally, a random intercept effect was included for each ant as we observed the  
566 same individuals twice (before and after unpacking).

567

### 568 **Chemical bioassay**

569 We determined whether ants detect infected pupae through potential changes in the  
570 pupae's cuticular chemical profile. We established internal infections in pupae by

571 exposing them to the pathogen and leaving them for 3 d in isolation. In pilot studies,  
572 approx. 50% of these pupae were then unpacked within 4 h of being introduced to  
573 ants. After 3 d, pupae were washed for 2.5 min in 300  $\mu$ l of either pentane solvent to  
574 reduce the abundance of all CHCs present on the pupae ( $n = 28$ ), or in autoclaved  
575 water as a handling control ( $n = 28$ ). After washing, pupae were allowed to air dry on  
576 sterile filter paper. Additionally, non-washed pupae were used as a positive control ( $n$   
577 = 30). Pupae were placed individually with a pair of ants in petri dishes and observed  
578 for unpacking for 4 h. We used GC–MS (see below for methodology) to confirm that  
579 washing was effective at removing cuticular compounds, by comparing the total  
580 amount of chemicals present on pupae washed in pentane to non- and water-washed  
581 pupae ( $n = 8$  per treatment; Fig S4). The number of pupae unpacked between the  
582 different treatments was analysed using a logistic regression (Fig 2A). As several  
583 researchers helped to wash the pupae, we included a random intercept for each person  
584 to control for any potential handling effects. Additionally, the experiment was run in  
585 two blocks on separate days, so we included a random intercept for each block to  
586 generalise beyond any potential differences between runs. The total peak area from  
587 the GC–MS analysis was compared between treatments using a KW test with post hoc  
588 comparisons.

589

### 590 **Chemical analysis of pupal hydrocarbon patterns**

591 To confirm that infected pupae had chemical profiles that are different from pathogen-  
592 exposed cocooned and control pupae, we exposed pupae to the pathogen or a sham  
593 control. Pupae were then isolated for 3 d to establish infections in the pathogen-  
594 exposed treatment (as above). Following isolation, pupae were individually placed  
595 with ants and observed for unpacking for 4 h. Unpacked pupae were immediately

596 frozen at  $-80\text{ }^{\circ}\text{C}$  with the removed cocoons ( $n = 13$ ) and we also froze cocooned  
597 pathogen-exposed pupa that had not yet been unpacked ( $n = 10$ ). Furthermore, we  
598 froze a pair of control pupae, of which one was cocooned ( $n = 12$ ), whilst the other  
599 was first experimentally unpacked (to test if the cocoon affects cuticular compound  
600 extraction;  $n = 12$ ). Cuticular chemicals were extracted from individual pupae and  
601 their cocoons in glass vials (Supelco; 1.8 ml) containing 100  $\mu\text{l}$  n-pentane solvent for  
602 5 min under gentle agitation. The vials were then centrifuged at 3000 rpm for 1 min to  
603 spin down any fungal conidiospores that might be remaining, and 80  $\mu\text{l}$  of the  
604 supernatant was transferred to fresh vials with 200  $\mu\text{l}$  glass inserts and sealed with  
605 Teflon faced silicon septa (both Supelco). The pentane solvent contained four internal  
606 standards relevant for our range of hydrocarbons ( $\text{C}_{27} - \text{C}_{37}$ ); n-Tetracosane, n-  
607 Triacontane, n-Dotriacontane and n-Hexatriacontane (Sigma Aldrich) at 0.5  $\mu\text{g/ml}$   
608 concentration, all fully deuterated to enable spectral traceability and separation of  
609 internal standards from ant-derived substances. We ran extracts from the different  
610 groups in a randomised manner, intermingled with blank runs containing only  
611 pentane, and negative controls containing the pentane plus internal standards (to  
612 exclude contaminants emerging e.g. from column bleeding), on the day of extraction,  
613 using GC-MS (Agilent Technologies; GC7890 coupled to MS5975C).

614

615 A liner with one restriction ring filled with borosilicate wool (Joint Analytical  
616 Systems) was installed in the programmed temperature vapourisation (PTV) injection  
617 port of the GC, which was pre-cooled to  $-20\text{ }^{\circ}\text{C}$  and set to solvent vent mode. 50  $\mu\text{l}$  of  
618 the sample extractions were injected automatically into the PTV port at 40  $\mu\text{l/s}$  using  
619 an autosampler (CTC Analytics, PAL COMBI-xt; Axel Semrau, CHRONOS 4.2  
620 software) equipped with a 100  $\mu\text{l}$  syringe (Hamilton). Immediately after injection, the

621 PTV port was ramped to 300 °C at 450 °C/min, and the sample transferred to the  
622 column (DB-5ms; 30 m × 0.25 mm, 0.25 µm film thickness) at a flow of 1 ml/min.  
623 The oven temperature program was held at 35 °C for 4.5 min, then ramped to 325 °C  
624 at 20 °C/min, and held at this temperature for 11 min. Helium was used as the carrier  
625 gas at a constant flow rate of 3 ml/min. For all samples, the MS transfer line was set  
626 to 325 °C, and the MS operated in electron ionisation mode (70 eV; ion source 230  
627 °C; quadrupole 150 °C, mass scan range 35-600 amu, with a detection threshold of  
628 150). Data acquisition was carried out using MassHunter Workstation, Data  
629 Acquisition software B.07.01 (Agilent Technologies).  
630  
631 Analytes were detected by applying deconvolution algorithms to the total ion  
632 chromatograms of the samples (MassHunter Workstation, Qualitative Analysis  
633 B.07.00). Compound identification (Table S1) was performed via manual  
634 interpretation using retention indices and spectral information, and the comparison of  
635 mass spectra to the Wiley 9<sup>th</sup> edition/NIST 11 combined mass spectral database  
636 (National Institute of Standards and Technologies). As the molecular ion was not  
637 detectable for all analytes based on electronic ionisation, we in addition performed  
638 chemical ionisation on pools of 20 pupae in 100 µl n-pentane solvent with 0.5 µg/ml  
639 internal standards. The higher extract concentration was needed to counteract the loss  
640 in ionisation efficiency in chemical ionisation mode. A specialised chemical  
641 ionisation source with methane as the reagent gas was used with the MS, while the  
642 chromatographic method was the same as in electronic ionisation mode. Use of  
643 external standards (C<sub>7</sub>-C<sub>40</sub> saturated alkane mixture [Sigma Aldrich]) enabled  
644 traceability of all peaks, and thus comparison to runs of single pupae extracts made in  
645 electronic ionisation mode. Modified Kovats retention indices for the peaks in

646 question were calculated based on those standards. To further aid identification, we  
647 separated the substances based on polarity using solid phase extraction fractionation.  
648 For this purpose, pools of 20 pupae were extracted in 500  $\mu$ l n-pentane containing 0.2  
649  $\mu$ g/ml internal standard, and separated on unmodified silica cartridges (Chromabond  
650  $\text{® SiOH}$ , 1ml, 100 mg) based on polarity. Prior to use, the cartridges were conditioned  
651 with 1 ml dichloromethane followed by 1 ml n-pentane. The entire extraction volume  
652 was loaded onto the silica and the eluent (fraction 1, highly apolar phase) collected. A  
653 wash with 1 ml pure n-pentane was added to fraction 1. Fraction 2 contained all  
654 substances washed off the silica with 1 ml 25 % dichloromethane in n-pentane, and  
655 finally a pure wash with 1 ml dichloromethane eluted all remaining substances  
656 (fraction 3). The polarity thus increased from fraction 1 through 3, but no polar  
657 substances were found. All fractions were dried under a gentle nitrogen stream and re-  
658 suspended in 70  $\mu$ l n-pentane followed by vigorous vortexing for 45 s. GC-MS  
659 analysis of all fractions was performed in electronic ionisation mode under the same  
660 chromatographic conditions as before.

661

662 To quantify the relative abundances of all compounds found on each pupa, analyte-  
663 characteristic quantifier and qualifier ions were used to establish a method enabling  
664 automatized quantification of their integrated peak area relative to the peak area of the  
665 closest internal standard. For each analyte, the relative peak area was normalised, i.e.  
666 divided by the total sum of all relative peak areas of one pupa, to standardise all pupa  
667 samples. Only analytes, which normalised peak area contributed more than 0.05% of  
668 the total peak area, were included in the statistical analysis. We compared the  
669 chemical profiles of the pupae using a perMANOVA analysis of the Mahalanobis  
670 dissimilarities between pupae, with post hoc perMANOVA comparisons. Since there

671 was no difference between cocooned and unpacked control pupae we combined them  
672 into a single control group for the final analysis (perMANOVA:  $F = 1.09$ ,  $df = 23$ ,  $P$   
673  $= 0.1$ ). We also performed a discriminant analysis of principle components (Fig 2B)  
674 to characterise the differences between the pupal treatments [88,89]. To identify the  
675 compounds that differ between treatments, we performed a conditional random forest  
676 classification ( $n$  trees = 500,  $n$  variables per split = 4) [88,90,91]. Random forest  
677 identified 9 compounds that were important in classifying the treatment group, of  
678 which 8 were significant when analysed using separate KW tests (results for  
679 significant compounds in Table S2). We followed up the KW tests with individual  
680 post hoc comparisons for each significant compound (Fig 2C-F, post hoc comparisons  
681 in Table S2).

682

### 683 **Effect of destructive disinfection on pathogen replication**

684 To test if destructive disinfection prevents *Metarhizium* from successfully replicating,  
685 we kept single pathogen-exposed pupae in petri dishes containing groups of 3 or 8  
686 ants. This allowed us to assess how group size affects the likelihood of fungal  
687 inhibition. For the following 10 d, we observed the pupae for unpacking. When a  
688 pupa was unpacked, we left it with the ants for a further 1 or 5 d so that they could  
689 perform destructive disinfection. This allowed us to assess how the duration of  
690 destructive disinfection affects the likelihood of fungal inhibition. The destructively  
691 disinfected pupae were then removed and placed into petri dishes on damp filter paper  
692 at 23 °C (8 ants 1 d and 5 d,  $n = 22$  pupae each; 3 ants 1 and 5 d,  $n = 18$  pupae each).  
693 We did not surface sterilise the pupae as this might have interfered with the  
694 destructive disinfection the ants had performed. Removed pupae were observed daily  
695 for *Metarhizium* sporulation for 30 d. To determine how many pupae sporulate in the

696 absence of destructive disinfection, we kept pathogen-exposed pupae without ants as a  
697 control and recorded the number that sporulated for 30 d ( $n = 25$ ). We compared the  
698 number of pupae that sporulated after 1 d, 5 d and in the absence of ants using logistic  
699 regressions and Tukey post hoc comparisons, separately for the two ant group sizes  
700 (Fig 3A, Fig S6).

701

### 702 ***In vitro* investigation of destructive disinfection**

703 We examined the individual effects of unpacking, biting and poison application on  
704 destructive disinfection by performing these behaviours *in vitro*. Pathogen-exposed  
705 pupae were initially kept with ants so that they could perform sanitary care. After 3 d,  
706 we removed the pupae and split them up into three groups: (i) pupae that we left  
707 cocooned, (ii) experimentally unpacked and (iii) experimentally unpacked and bitten.  
708 We simulated the damage the ants achieve through biting by damaging the pupal  
709 cuticle and removing their limbs with forceps. The pupae were then treated with either  
710 synthetic ant poison (60% formic acid and 2% acetic acid, in water; applied at a dose  
711 equivalent to what ants apply during destructive disinfection; Fig S8) or autoclaved  
712 distilled water as a control, using pressurised spray bottles (Lacor) to evenly coat the  
713 pupae in liquid. The pupae were allowed to air dry for 5 min before being rolled over  
714 and sprayed again and allowed to dry a further 5 min. All pupae were then placed into  
715 separate petri dishes and monitored daily for *Metarhizium* sporulation (cocooned +  
716 poison,  $n = 24$ ; unpacked + poison + biting,  $n = 24$ ; all other treatments,  $n = 25$ ). The  
717 number of pupae sporulating was analysed using a logistic regression with Firth's  
718 penalised likelihood, which offers a solution to the monotone likelihood caused by the  
719 complete absence of sporulation in one of the groups (R package 'brglm' [92]). Pupal  
720 manipulation (cocooned/unpacked only/unpacked and bitten), chemical treatment

721 (water or poison) and their interaction were included as main effects (Fig 3B, Fig S7).

722 We followed up this analysis with Tukey post hoc comparisons (Table S3).

723

#### 724 **Disease transmission from infectious and destructively disinfected pupae**

725 We tested the impact of destructive disinfection on disease transmission within groups

726 of ants by keeping them with sporulating pupae or pupae that had been destructively

727 disinfected. Infections were established in pupae (as above) and half were allowed to

728 sporulate ( $n = 11$ ), whilst the other half were experimentally destructively disinfected

729 (as above;  $n = 11$ ). Pupae were then kept individually with groups of 5 ants in mini-

730 nests (cylindrical containers [ $\varnothing = 90$  mm] with a second, smaller chamber covered in

731 red foil [ $\varnothing = 33$  mm]). Ant mortality was monitored daily for 30 d. Dead ants were

732 removed, surface sterilised and observed for *Metarhizium* sporulation. The number of

733 ants dying from *Metarhizium* infections in each treatment was compared using a

734 logistic regression (Fig 4A). Mini-nest identity was included as a random intercept

735 effect as ants from the same group are non-independent.

736

#### 737 **Acknowledgments**

738 We thank L. Lovicar for producing SEMs, B. Leyrer for help with chemical analysis,

739 B. Milutinović and M. Bračić for assistance with the chemical bioassay and the *Social*

740 *Immunity* group at IST Austria for ant collections and comments on earlier drafts of

741 the manuscript. Finally, we are grateful to M. Sixt, D. Siekhaus and J. J. Boomsma for

742 discussion of the project throughout.

743

#### 744 **Funding statement**



745 This study received funding from the European Research Council under the European  
746 Union's Seventh Framework Programme (FP7/2007-2013)/ERC grant agreement n°  
747 243071 to S.C. and the People Programme (Marie Curie Actions) of the European  
748 Union's Seventh Framework Programme (FP7/2007-2013) under REA grant  
749 agreement n° 302004 to L.V.U.

750

### 751 **Competing financial interests**

752 The authors declare no competing financial interests.

753

754

### 755 **References**

- 756 1. Schmid-Hempel P. Evolutionary parasitology: the integrated study of  
757 infections, immunology, ecology, and genetics. New York: Oxford University  
758 Press; 2011.
- 759 2. Nunn CL, Altizer S. Infectious diseases in primates: behavior, ecology and  
760 evolution. New York: Oxford University Press; 2006.
- 761 3. Schmid-Hempel P. Parasites and their social hosts. Trends Parasitol. 2017;  
762 doi:10.1016/j.pt.2017.01.003
- 763 4. Alexander RD. The evolution of social behavior. Annu Rev Ecol Syst. 1974;5:  
764 325–383. doi:10.1146/annurev.es.05.110174.001545
- 765 5. Hamilton WD. Kinship, recognition, disease, and intelligence: constraints of  
766 social evolution. In: Ito Y, Brown J, Kikkawa J, editors. Animal societies:  
767 theories and facts. Tokyo: Japan Sci. Soc. Press; 1987. pp. 81–102.
- 768 6. Ezenwa VO, Ghai RR, McKay AF, Williams AE. Group living and pathogen  
769 infection revisited. Curr Opin Behav Sci. 2016;12: 66–72.

- 770           doi:10.1016/j.cobeha.2016.09.006
- 771    7.    Queller DC, Strassmann JE. Eusociality. *Curr Biol.* 2003;13: R861–R863.
- 772           doi:10.1016/j.cub.2003.10.043
- 773    8.    Bourke AFG. *Principles of social evolution.* Oxford: Oxford University Press;
- 774           2011.
- 775    9.    West SA, Fisher RM, Gardner A, Toby Kiers E. Major evolutionary transitions
- 776           in individuality. *Proc Natl Acad Sci.* 2015;112: 10112–10119.
- 777           doi:10.1073/pnas.1421402112
- 778    10.   Wheeler WM. The ant-colony as an organism. *J Morphol.* 1911;22: 307–325.
- 779           doi:10.1002/jmor.1050220206
- 780    11.   Boomsma JJ, Gawne R. Superorganismality and caste differentiation as points
- 781           of no return: how the major evolutionary transitions were lost in translation.
- 782           *Biol Rev.* 2017;Forthcoming.
- 783    12.   Cremer S, Armitage SAO, Schmid-Hempel P. Social immunity. *Curr Biol.*
- 784           2007;17: 693–702. doi:10.1016/j.cub.2007.06.008
- 785    13.   Shorter JR, Rueppell O. A review on self-destructive defense behaviors in
- 786           social insects. *Insectes Soc.* 2011;59: 1–10. doi:10.1007/s00040-011-0210-x
- 787    14.   Stroeymeyt N, Casillas-Pérez B, Cremer S. Organisational immunity in social
- 788           insects. *Curr Opin Insect Sci.* 2014;5: 1–15. doi:10.1016/j.cois.2014.09.001
- 789    15.   Wilson-Rich N, Spivak M, Fefferman NH, Starks PT. Genetic, individual, and
- 790           group facilitation of disease resistance in insect societies. *Annu Rev Entomol.*
- 791           2009;54: 405–23. doi:10.1146/annurev.ento.53.103106.093301
- 792    16.   Meunier J. Social immunity and the evolution of group living in insects. *Philos*
- 793           *Trans R Soc B Biol Sci.* 2015;370: 20140102. doi:10.1098/rstb.2014.0102
- 794    17.   Cremer S, Sixt M. Analogies in the evolution of individual and social

- 795 immunity. *Philos Trans R Soc London B Biol Sci.* 2009;364: 129–42.  
796 doi:10.1098/rstb.2008.0166
- 797 18. Tranter C, LeFevre L, Evison SEF, Hughes WOH. Threat detection: contextual  
798 recognition and response to parasites by ants. *Behav Ecol.* 2015;26: 396–405.  
799 doi:10.1093/beheco/aru203
- 800 19. Rosengaus R, Traniello JFA. Disease susceptibility and the adaptive nature of  
801 colony demography in the dampwood termite *Zootermopsis angusticollis*.  
802 *Behav Ecol Sociobiol.* 2001;50: 546–556. doi:10.1007/s002650100394
- 803 20. Reber A, Purcell J, Buechel SD, Buri P, Chapuisat M. The expression and  
804 impact of antifungal grooming in ants. *J Evol Biol.* 2011;24: 954–64.  
805 doi:10.1111/j.1420-9101.2011.02230.x
- 806 21. Graystock P, Hughes WOH. Disease resistance in a weaver ant, *Polyrhachis*  
807 *dives*, and the role of antibiotic-producing glands. *Behav Ecol Sociobiol.*  
808 2011;65: 2319–2327. doi:10.1007/s00265-011-1242-y
- 809 22. Tragust S, Mitteregger B, Barone V, Konrad M, Ugelvig L V, Cremer S. Ants  
810 disinfect fungus-exposed brood by oral uptake and spread of their poison. *Curr*  
811 *Biol.* 2013;23: 76–82. doi:10.1016/j.cub.2012.11.034
- 812 23. Hughes WOH, Eilenberg J, Boomsma JJ. Trade-offs in group living:  
813 transmission and disease resistance in leaf-cutting ants. *Proc Biol Sci B Biol*  
814 *Sci.* 2002;269: 1811–1819. doi:10.1098/rspb.2002.2113
- 815 24. Loreto RG, Hughes DP. Disease in the society: infectious cadavers result in  
816 collapse of ant sub-colonies. *PLoS One.* 2016;11: e0160820.  
817 doi:10.1371/journal.pone.0160820
- 818 25. Deacon JW. *Fungal Biology.* Malden: Blackwell Publishing; 2006.
- 819 26. Ugelvig L V, Kronauer DJC, Schrempf A, Heinze J, Cremer S. Rapid anti-

- 820 pathogen response in ant societies relies on high genetic diversity. *Proc R Soc*  
821 *B.* 2010;277: 2821–2828. doi:10.1098/rspb.2010.0644
- 822 27. Tragust S, Ugelvig L V, Chapuisat M, Heinze J, Cremer S. Pupal cocoons  
823 affect sanitary brood care and limit fungal infections in ant colonies. *BMC*  
824 *Evol Biol.* 2013;13: 225. doi:10.1186/1471-2148-13-225
- 825 28. Okuno M, Tsuji K, Sato H, Fujisaki K. Plasticity of grooming behavior against  
826 entomopathogenic fungus *Metarhizium anisopliae* in the ant *Lasius japonicus*.  
827 *J Ethol.* 2011;30: 23–27. doi:10.1007/s10164-011-0285-x
- 828 29. Leonhardt SD, Menzel F, Nehring V, Schmitt T. Ecology and evolution of  
829 communication in social insects. *Cell.* 2016;164: 1277–1287.  
830 doi:10.1016/j.cell.2016.01.035
- 831 30. Theraulaz G, Bonabeau E, Deneubourg J. Response threshold reinforcements  
832 and division of labour in insect societies. *Proc R Soc B Biol Sci.* 1998;265:  
833 327–332. doi:10.1098/rspb.1998.0299
- 834 31. Beshers SN, Fewell JH. Models of division of labor in social insects. *Annu Rev*  
835 *Entomol.* 2001;46: 413–440. doi:10.1146/annurev.ento.46.1.413
- 836 32. Sharma KR, Enzmann BL, Schmidt Y, Moore D, Jones GR, Parker J, *et al.*  
837 Cuticular hydrocarbon pheromones for social behavior and their coding in the  
838 ant antenna. *Cell Rep.* 2015; 1–11. doi:10.1016/j.celrep.2015.07.031
- 839 33. Hefetz A, Blum MS. Biosynthesis of formic acid by the poison glands of  
840 formicine ants. *Biochim Biophys Acta.* 1978;543: 484–496. doi:10.1016/0304-  
841 4165(78)90303-3
- 842 34. Walch M, Dotiwala F, Mulik S, Thiery J, Kirchhausen T, Clayberger C, *et al.*  
843 Cytotoxic cells kill intracellular bacteria through granulysin-mediated delivery  
844 of granzymes. *Cell.* 2014;157: 1309–1323. doi:10.1016/j.cell.2014.03.062

- 845 35. Kägi D, Ledermann B, Bürki K, Seiler P, Odermatt B, Olsen KJ, *et al.*  
846 Cytotoxicity mediated by T cells and natural killer cells is greatly impaired in  
847 perforin-deficient mice. *Nature*. 1994;369: 31–37. doi:10.1038/369031a0
- 848 36. Chowdhury D, Lieberman J. Death by a thousand cuts: granzyme pathways of  
849 programmed cell death. *Annu Rev Immunol*. 2008;26: 389–420.  
850 doi:10.1146/annurev.immunol.26.021607.090404
- 851 37. Shore SL, Cromeans TL, Romano TJ. Immune destruction of virus-infected  
852 cells early in the infectious cycle. *Nature*. 1976;262: 695–696.  
853 doi:10.1038/262695a0
- 854 38. Leclerc J-B, Detrain C. Ants detect but do not discriminate diseased workers  
855 within their nest. *Sci Nat*. 2016;103: 70. doi:10.1007/s00114-016-1394-8
- 856 39. Bos N, Lefèvre T, Jensen AB, D’Ettorre P. Sick ants become unsociable. *J*  
857 *Evol Biol*. 2012;25: 342–51. doi:10.1111/j.1420-9101.2011.02425.x
- 858 40. Diez L, Moquet L, Detrain C. Post-mortem changes in chemical profile and  
859 their influence on corpse removal in ants. *J Chem Ecol*. 2013;39: 1424–1432.  
860 doi:10.1007/s10886-013-0365-1
- 861 41. Qiu H-L, Lu L-H, Shi Q-X, Tu C-C, Lin T, He Y-R. Differential necrophoric  
862 behaviour of the ant *Solenopsis invicta* towards fungal-infected corpses of  
863 workers and pupae. *Bull Entomol Res*. 2015;105: 607–614.  
864 doi:10.1017/S0007485315000528
- 865 42. Wilson EO, Durlach NI, Roth LM. Chemical releaser of necrophoric behavior  
866 in ants. *Psyche*. 1958;65: 108–114. doi:10.1155/1958/69391
- 867 43. Trabalon M, Plateaux L, Péru L, Bagnères A-G, Hartmann N. Modification of  
868 morphological characters and cuticular compounds in worker ants *Leptothorax*  
869 *nylanderi* induced by endoparasites *Anomotaenia brevis*. *J Insect Physiol*.

- 870 2000;46: 169–178. doi:10.1016/S0022-1910(99)00113-4
- 871 44. Lin L, Fang W, Liao X, Wang F, Wei D, St. Leger RJ. The MrCYP52  
872 cytochrome P450 monooxygenase gene of *Metarhizium robertsii* is important  
873 for utilizing insect epicuticular hydrocarbons. PLoS One. 2011;6: e28984.  
874 doi:10.1371/journal.pone.0028984
- 875 45. Richard F-J, Aubert A, Grozinger C. Modulation of social interactions by  
876 immune stimulation in honey bee, *Apis mellifera*, workers. BMC Biol. 2008;6:  
877 50. doi:10.1186/1741-7007-6-50
- 878 46. Richard F-J, Holt HL, Grozinger CM. Effects of immunostimulation on social  
879 behavior, chemical communication and genome-wide gene expression in honey  
880 bee workers (*Apis mellifera*). BMC Genomics. 2012;13: 558.  
881 doi:10.1186/1471-2164-13-558
- 882 47. Baracchi D, Fadda A, Turillazzi S. Evidence for antiseptic behaviour towards  
883 sick adult bees in honey bee colonies. J Insect Physiol. 2012;58: 1589–1596.  
884 doi:10.1016/j.jinsphys.2012.09.014
- 885 48. Shakhar K, Shakhar G. Why do we feel sick when infected—can altruism play  
886 a role? PLoS Biol. 2015;13: e1002276. doi:10.1371/journal.pbio.1002276
- 887 49. Ravichandran KS. Find-me and eat-me signals in apoptotic cell clearance:  
888 progress and conundrums. J Exp Med. 2010;207: 1807–1817.  
889 doi:10.1084/jem.20101157
- 890 50. Grimsley C, Ravichandran KS. Cues for apoptotic cell engulfment: eat-me,  
891 don't eat-me and come-get-me signals. Trends Cell Biol. 2003;13: 648–656.  
892 doi:10.1016/j.tcb.2003.10.004
- 893 51. Tragust S. External immune defence in ant societies (Hymenoptera:  
894 Formicidae): the role of antimicrobial venom and metapleural gland secretion.

- 895 Myrmecol news. 2016;23: 119–128.
- 896 52. Knaden M, Wehner R. Nest defense and conspecific enemy recognition in the  
897 desert ant *Cataglyphis fortis*. J Insect Behav. 2003;16: 717–730.  
898 doi:10.1023/B:JOIR.0000007706.38674.73
- 899 53. Reber A, Chapuisat M. Diversity, prevalence and virulence of fungal  
900 entomopathogens in colonies of the ant *Formica selysi*. Insectes Soc. 2012;59:  
901 231–239. doi:10.1007/s00040-011-0209-3
- 902 54. Hughes WOH, Thomsen L, Eilenberg J, Boomsma JJ. Diversity of  
903 entomopathogenic fungi near leaf-cutting ant nests in a neotropical forest, with  
904 particular reference to *Metarhizium anisopliae* var. *anisopliae*. J Invertebr  
905 Pathol. 2004;85: 46–53. doi:10.1016/j.jip.2003.12.005
- 906 55. Cremer S, Ugelvig L V, Drijfhout FP, Schlick-Steiner BC, Steiner FM, Seifert  
907 B, *et al.* The evolution of invasiveness in garden ants. PLoS One. 2008;3:  
908 e3838. doi:10.1371/journal.pone.0003838
- 909 56. Keller S, Kessler P, Schweizer C. Distribution of insect pathogenic soil fungi in  
910 Switzerland with special reference to *Beauveria brongniartii* and *Metarhizium*  
911 *anisopliae*. BioControl. 2003;48: 307–319. doi:10.1023/A:1023646207455
- 912 57. Roberts DW, St. Leger RJ. *Metarhizium* spp., cosmopolitan insect-pathogenic  
913 fungi: mycological aspects. Adv Appl Microbiol. 2004. pp. 1–70.  
914 doi:10.1016/S0065-2164(04)54001-7
- 915 58. Shimazu M. *Metarhizium cylindrospora* Chen et Guo (Deuteromycotina:  
916 Hyphomycetes), the causative agent of an epizootic on *Graptopsaltria*  
917 *nigrofuscata* Motchulski (Homoptera: Cicadidae). Appl Entomol Zool. 1989;24:  
918 430–434. doi:10.1303/aez.24.430
- 919 59. Lomer CJ, Prior C, Kooyman C. Development of *Metarhizium* spp. for the

- 920 control of grasshoppers and locusts. Mem Entomol Soc Canada. 1997;129:  
921 265–286. doi:10.4039/entm129171265-1
- 922 60. Hughes DP, Araújo J, Loreto R, Quevillon L, de Bekker C, Evans HC. From so  
923 simple a beginning: the evolution of behavioral manipulation by fungi. Adv  
924 Genet. 2016;94: 1–33. doi:10.1016/bs.adgen.2016.01.004
- 925 61. Loreto RG, Elliot SL, Freitas MLR, Pereira TM, Hughes DP. Long-term  
926 disease dynamics for a specialized parasite of ant societies: a field study. PLoS  
927 One. 2014;9: e103516. doi:10.1371/journal.pone.0103516
- 928 62. Małagocka J, Jensen AB, Eilenberg J. *Pandora formicae*, a specialist ant  
929 pathogenic fungus: new insights into biology and taxonomy. J Invertebr Pathol.  
930 2017;143: 108–114. doi:10.1016/j.jip.2016.12.007
- 931 63. Agosta SJ, Janz N, Brooks DR. How specialists can be generalists: resolving  
932 the “parasite paradox” and implications for emerging infectious disease.  
933 Zoologia. 2010;27: 151–162. doi:10.1590/S1984-46702010000200001
- 934 64. Verza SS, Diniz EA, Chiarelli MF, Mussury RM, Bueno OC. Waste of leaf-  
935 cutting ants: disposal, nest structure, and abiotic soil factors around internal  
936 waste chambers. Acta Ethol.; 2017; doi:10.1007/s10211-017-0255-6
- 937 65. Hart AG, Ratnieks FLW. Waste management in the leaf-cutting ant *Atta*  
938 *colombica*. Behav Ecol. 2002;13: 224–231. doi:10.1093/beheco/13.2.224
- 939 66. Farji-Brener AG, Elizalde L, Fernández-Marín H, Amador-Vargas S. Social  
940 life and sanitary risks: evolutionary and current ecological conditions  
941 determine waste management in leaf-cutting ants. Proc R Soc B Biol Sci.  
942 2016;283: 20160625. doi:10.1098/rspb.2016.0625
- 943 67. Spivak M, REuter GS. Resistance to American foulbrood disease by honey bee  
944 colonies *Apis mellifera* bred for hygienic behavior. Apidologie. 2001;32: 555–



- 945 565. doi:10.1051/apido:2001103
- 946 68. Chouvenc T, Su N-Y. When subterranean termites challenge the rules of fungal  
947 epizootics. PLoS One. 2012;7: e34484. doi:10.1371/journal.pone.0034484
- 948 69. Chouvenc T, Su N-Y, Robert A. Inhibition of *Metarhizium anisopliae* in the  
949 alimentary tract of the eastern subterranean termite *Reticulitermes flavipes*. J  
950 Invertebr Pathol. 2009;101: 130–6. doi:10.1016/j.jip.2009.04.005
- 951 70. Rosengaus RB, Schultheis KF, Yalonetskaya A, Bulmer MS, DuComb WS,  
952 Benson RW, *et al.* Symbiont-derived  $\beta$ -1,3-glucanases in a social insect:  
953 mutualism beyond nutrition. Front Microbiol. 2014;5: 1–11.  
954 doi:10.3389/fmicb.2014.00607
- 955 71. Rosengaus R, Guldin M, Traniello JFA. Inhibitory effect of termite fecal  
956 pellets on fungal spore germination. J Chem Ecol. 1998;24: 1697–1706.  
957 doi:10.1023/A:1020872729671
- 958 72. Rosengaus RB, Traniello JFA, Bulmer MS. Ecology, behavior and evolution of  
959 disease resistance in termites. In: Bignell DE, Roisin Y, Lo N, editors. Biology  
960 of termites: a modern synthesis. New York: Springer; 2011. pp. 165–191.
- 961 73. R Core Team. R: A language and environment for statistical computing.  
962 Vienna, Austria: R Foundation for Statistical Computing; 2012.
- 963 74. Bolker BM, Brooks ME, Clark CJ, Geange SW, Poulsen JR, Stevens MHH, *et*  
964 *al.* Generalized linear mixed models: a practical guide for ecology and  
965 evolution. Trends Ecol Evol. 2009;24: 127–35. doi:10.1016/j.tree.2008.10.008
- 966 75. Benjamini Y, Hochberg Y. Controlling the false discovery rate: a practical and  
967 powerful approach to multiple testing. J R Stat Soc. 1995;57: 289–300.  
968 doi:10.2307/2346101
- 969 76. García L V. Escaping the Bonferroni iron claw in ecological studies. Oikos.

- 970 2004;105: 657–663. doi:10.1111/j.0030-1299.2004.13046.x
- 971 77. Bates D, Maechler M, Bolker B, Walker S. lme4: linear mixed-effects models  
972 using Eigen and S4. R Foundation for Statistical Computing; 2014.
- 973 78. Nieuwenhuis R, Pelzer B, te Grotenhuis M. influence.ME: tools for detecting  
974 influential data in mixed effects models. R J. 2012;4: 38–47.
- 975 79. Kuznetsova, Alexandra, Brockhoff PB, Christensen RHB. lmerTest: tests in  
976 linear mixed effects models. R Foundation for Statistical Computing; 2015.
- 977 80. Ploner M, Heinze G. coxphf: Cox regression with Firth’s penalized likelihood.  
978 R Foundation for Statistical Computing; 2015.
- 979 81. de Mendiburu F. agricolae: statistical procedures for agricultural research. R  
980 Foundation for Statistical Computing; 2016.
- 981 82. Oksanen J, Blanchet FG, Kindt R, Legendre P, Minchin PR, O’Hara B, *et al.*  
982 vegan: community ecology package. R Foundation for Statistical Computing;  
983 2016.
- 984 83. Bretz F, Hothorn T, Westfall P. Multiple comparisons using R. Boca Ration:  
985 CRC Press; 2011.
- 986 84. Wickham H. ggplot2: elegant graphics for data analysis. New York: Springer;  
987 2009.
- 988 85. Lacey LA, Brooks WM. Initial handling and diagnosis of diseased  
989 invertebrates. In: Lacey LA, editor. Manual of techniques in invertebrate  
990 pathology. San Diego: Academic Press; 1997. p. 5.
- 991 86. Blumstein DT, Daniel JC. Quantifying behavior the JWatcher way.  
992 Sunderland: Sinauer Associates; 2007.
- 993 87. Harrison XA. Using observation-level random effects to model overdispersion  
994 in count data in ecology and evolution. PeerJ. 2014;2: e616.

- 995           doi:10.7717/peerj.616
- 996   88.   De Moraes CM, Stanczyk NM, Betz HS, Pulido H, Sim DG, Read AF, *et al.*
- 997           Malaria-induced changes in host odors enhance mosquito attraction. *Proc Natl*
- 998           *Acad Sci.* 2014;111: 11079–11084. doi:10.1073/pnas.1405617111
- 999   89.   Jombart T, Devillard S, Balloux F. Discriminant analysis of principal
- 1000           components: a new method for the analysis of genetically structured
- 1001           populations. *BMC Genet.* 2010;11: 94. doi:10.1186/1471-2156-11-94
- 1002   90.   Strobl C, Hothorn T, Zeileis A. Party on! *R J.* 2009;1: 14–17.
- 1003   91.   Strobl C, Malley J, Tutz G. An introduction to recursive partitioning: rationale,
- 1004           application, and characteristics of classification and regression trees, bagging,
- 1005           and random forests. *Psychol Methods.* 2009;14: 323–348.
- 1006           doi:10.1037/a0016973
- 1007   92.   Kosmidis I. *brglm: Bias reduction in binomial-response generalized linear*
- 1008           *models.* R Foundation for Statistical Computing; 2013.
- 1009
